# Supplementary material for: Triple captured iron by defect abundant NiO for efficient water oxidation
Source: Royal Society of Chemistry journal article supplement (doi:10.1039/d1qi01595h), 2022-01-01
Supplement: d1qi01595h1.pdf [file d1qi01595h1.pdf]

## Supplementary Information

# Triple captured iron by defect abundant NiO for efficient water oxidation

Ya-Nan Zhou, Feng-Ge Wang, Jian-Cheng Zhou, Bin Dong \*, Yi-Wen Dong,

Xin Liu, Bin Liu, Jian-Feng Yu, Yong-Ming Chai \*

*State Key Laboratory of Heavy Oil Processing, College of Chemical Engineering, China University of*

*Petroleum (East China), Qingdao 266580, PR China*

---

\* Corresponding author. Email: [dongbin@upc.edu.cn](mailto:dongbin@upc.edu.cn) (B. Dong); [ymchai@upc.edu.cn](mailto:ymchai@upc.edu.cn) (Y.M. Chai)

Tel: +86-532-86981156, Fax: +86-532-86981156

## **Table of content**

|                                               |           |
|-----------------------------------------------|-----------|
| <b>Experimental section</b>                   | <b>3</b>  |
| <i>Characterization</i>                       | <b>3</b>  |
| <i>Electrochemical measurements</i>           | <b>3</b>  |
| <i>Density functional theory calculations</i> | <b>4</b>  |
| <b>Structure and morphology study</b>         | <b>5</b>  |
| <i>Morphology characterization</i>            | <b>6</b>  |
| <i>XRD results</i>                            | <b>10</b> |
| <i>EPR results</i>                            | <b>11</b> |
| <i>Surface elements</i>                       | <b>12</b> |
| <b>OER performance measurements</b>           | <b>15</b> |
| <i>OER activity</i>                           | <b>15</b> |
| <i>Morphologies after OER</i>                 | <b>18</b> |
| <i>Surface reconstruction</i>                 | <b>19</b> |
| <b>DFT calculations</b>                       | <b>22</b> |

## Characterization

The scanning electron microscopy (SEM) (JEM 2100F) and transmission electron microscopy (TEM) (FEI Tecni G20, 200 kV) are used to characterize the morphology and structure of synthesized samples. The X-ray diffraction (XRD) with Cu K $\alpha$  radiation ( $\lambda = 1.54$  Å) on the Brook D8 advance equipment is applied to collect the crystal structure and phase information of the samples. X-ray photoelectron spectroscopy (XPS) is applied to analyze the surface chemical structure and valence information by Thermo Fisher K-alpha 250Xi. Raman spectrum was collected on LabRAM HR Evolution with an excitation wavelength of 514 nm. The inductively coupled plasma (ICP) spectrometer is used to detect the element contents. The specific surface area is determined on a tristar II Plus system. The defects are characterized by electron paramagnetic resonance (EPR) spectrum on electron paramagnetic resonance spectrometer (JEOL JES FA200).

## Electrochemical measurements

Electrochemical performance tests were performed at room temperature through a standard three-electrode system with Gamry Reference 3000 electrochemical equipment. The cut MoNi foam (1 cm  $\times$  2 cm) was ultrasonically washed by hydrochloric acid, acetone, ethanol and deionized water, respectively, for 20 minutes to remove the surface impurity. All electrochemical measurements were conducted under the same conditions in 1 M KOH. The obtained samples, Pt plate electrode and saturated calomel electrode were selected as working electrode, counter electrode and reference electrode, respectively. The scan rate of the linear sweep voltammetry (LSV) curve was maintained at 5 mV s<sup>-1</sup>. All the electrode potential were converted to reversible hydrogen electrode (RHE) via the Nernst equation:  $E_{\text{RHE}} = E_{\text{SCE}} +$

0.0592 pH +  $E^0_{\text{SCE}}$  ( $E^0_{\text{SCE}} = 0.245$  V). The CV curves with different scanning rates are employed to determine the double-layer capacitances ( $C_{\text{dl}}$ ). The stability of the sample was evaluated via both chronoamperometry and fast CV cycles with a rate of  $40 \text{ mV s}^{-1}$  for 3000 sweeps. The frequency of electrochemical impedance spectroscopy (EIS) was range from  $10^5$  Hz to 0.1 Hz at 0.20 V vs. SCE with an AC voltage of 5 mV. The activation of samples is performed by the LSV scan with a scan rate of  $10 \text{ mV s}^{-1}$ .

## Density functional theory calculations

The density functional theory (DFT) calculations were performed using the Materials Studio software. The exchange-correlation interaction was described by generalized gradient approximation (GGA) with the Perdew-Burke-Ernzerhof (PBE) functional.<sup>1-3</sup> The energy cutoff was set to 570 eV. The Monkhorst-Pack k-point mesh was set as  $3 \times 3 \times 6$ ,  $3 \times 3 \times 5$ ,  $3 \times 3 \times 5$  and  $3 \times 3 \times 5$  for NiO, Fe-NiO, NiOOH and Fe-NiOOH models, respectively. The convergence criterion in geometry optimization was set as  $10^{-5}$  eV/atom for energy.

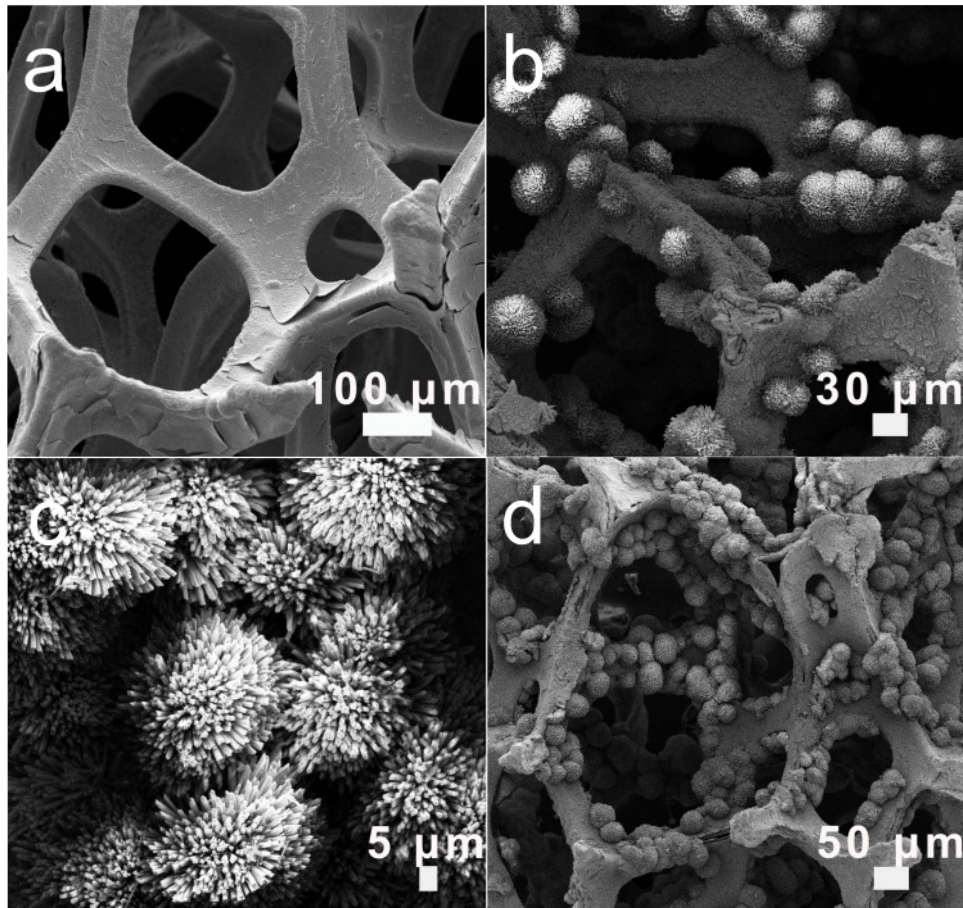

**Fig. S1** SEM morphologies of (a) MoNi foam, (b and c) NiMoO<sub>4</sub>@NiO. (d) Fe-NiMoO<sub>4</sub>@NiO-30.

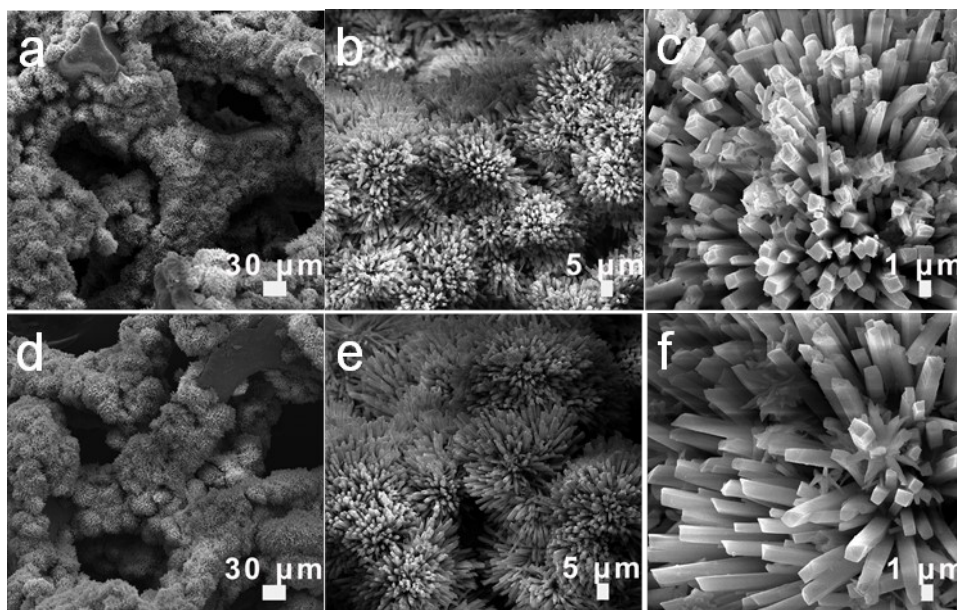

**Fig. S2** SEM morphologies of (a-c) Fe-NiMoO<sub>4</sub>@NiO-50 and (d-f) Fe-NiMoO<sub>4</sub>@NiO-5.

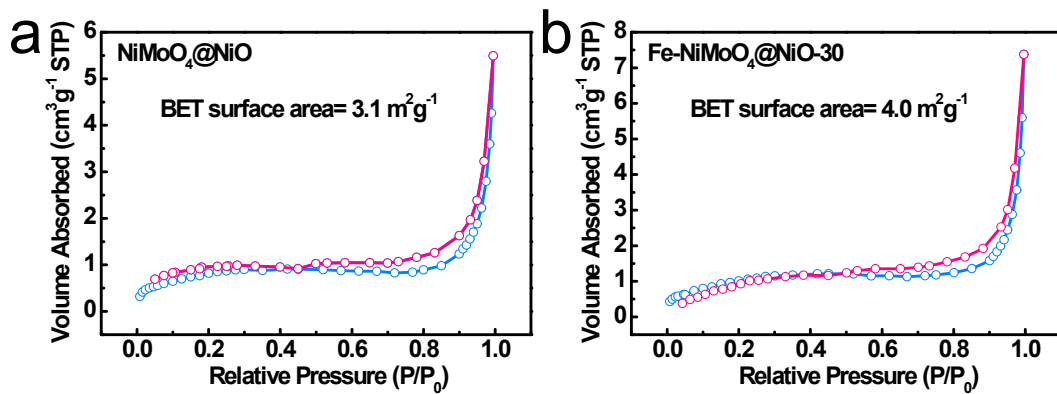

Fig. S3 N<sub>2</sub> adsorption-desorption isotherm of NiMoO<sub>4</sub>@NiO and Fe-NiMoO<sub>4</sub>@NiO-

30.

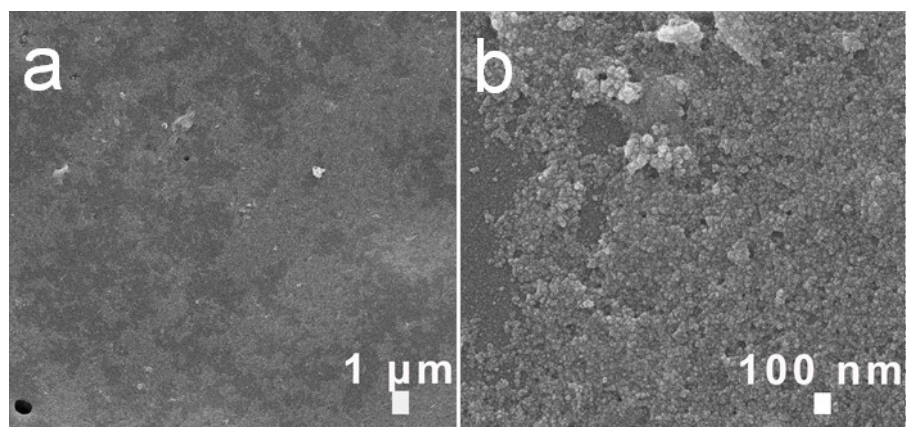

**Fig. S4** SEM morphologies of Fe-Fe<sub>2</sub>MoO<sub>4</sub>-30 sample.



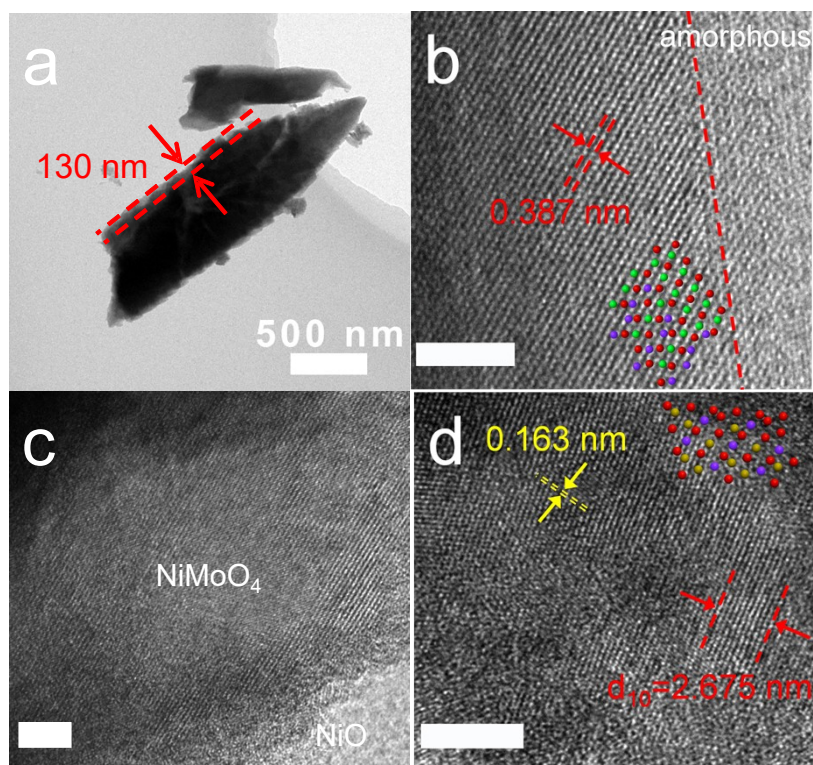

**Fig. S5** (a) TEM image and (b) HRTEM image of NiMoO<sub>4</sub>@NiO precursor, HRTEM image of (c) Fe-NiMoO<sub>4</sub>@NiO-30 and (d) Fe-Fe<sub>2</sub>MoO<sub>4</sub>-30 sample. Two distinguishable lattices with interplanar spacing of 0.163 nm and 0.267 nm, corresponding to the (511) plane of Fe<sub>2</sub>MoO<sub>4</sub> and (101) plane of MoO<sub>3</sub>, respectively. Scale bar: 5 nm. Insert: the illustration of crystal lattice of NiMoO<sub>4</sub>/NiO interface (b) and Fe<sub>2</sub>MoO<sub>4</sub>. Red ball: O; green ball: Ni; purple ball: Mo; brown ball: Fe.

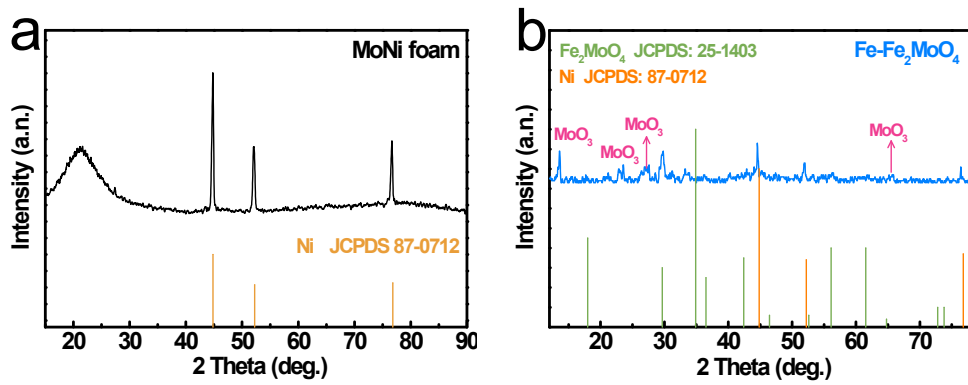

**Fig. S6** XRD pattern of (a) Commercial MoNi foam and (b) Fe-Fe<sub>2</sub>MoO<sub>4</sub>.

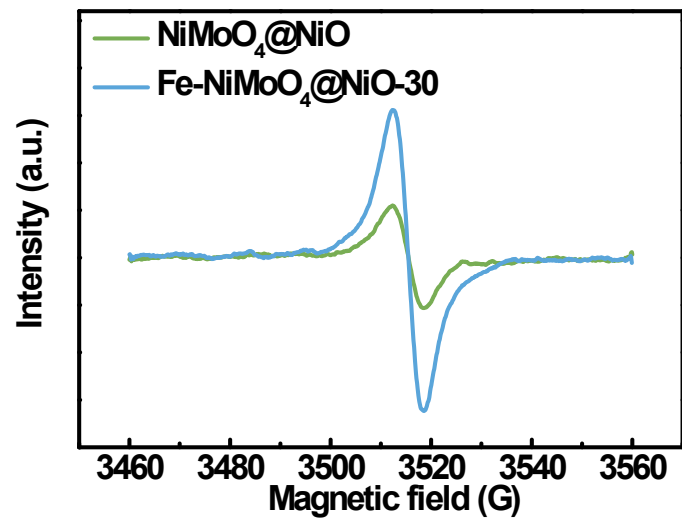

Fig. S7 EPR spectra of  $\text{NiMoO}_4@NiO$  and  $\text{Fe-NiMoO}_4@NiO-30$ .

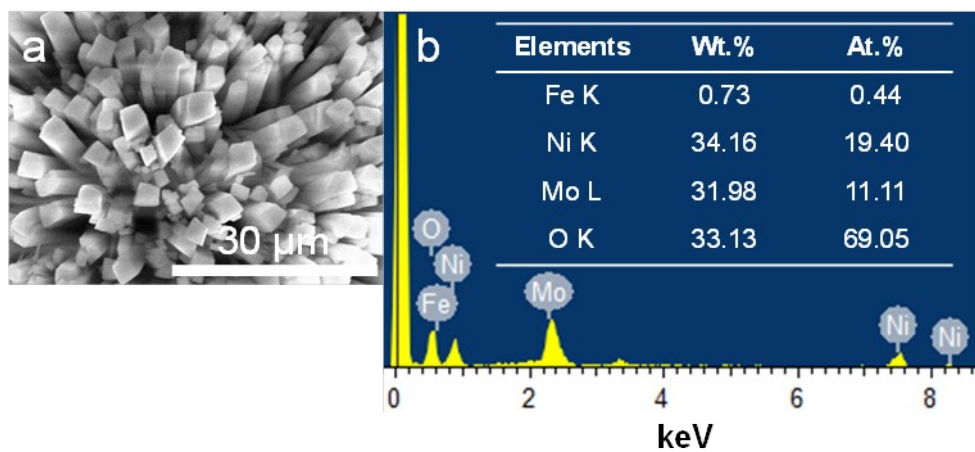

**Fig. S8** (a) SEM image and (b) Corresponding element contents of Fe-

NiMoO<sub>4</sub>@NiO-30.

**Table S1** Element contents of Fe, Ni, Mo and O detected by EDS in Fe-NiMoO<sub>4</sub>@NiO-5 and Fe-NiMoO<sub>4</sub>@NiO-50 samples.

|         | Fe-NiMoO <sub>4</sub> @NiO-5 |        | Fe-NiMoO <sub>4</sub> @NiO-50 |        |
|---------|------------------------------|--------|-------------------------------|--------|
| Element | At.%                         | Wt.%   | At.%                          | Wt.%   |
| Fe K    | 0.34                         | 0.58   | 0.70                          | 1.18   |
| Ni K    | 18.19                        | 32.33  | 23.44                         | 41.38  |
| Mo L    | 11.41                        | 33.15  | 8.72                          | 25.14  |
| O K     | 70.06                        | 33.94  | 67.14                         | 32.30  |
| Total   | 100.00                       | 100.00 | 100.00                        | 100.00 |
| account |                              |        |                               |        |

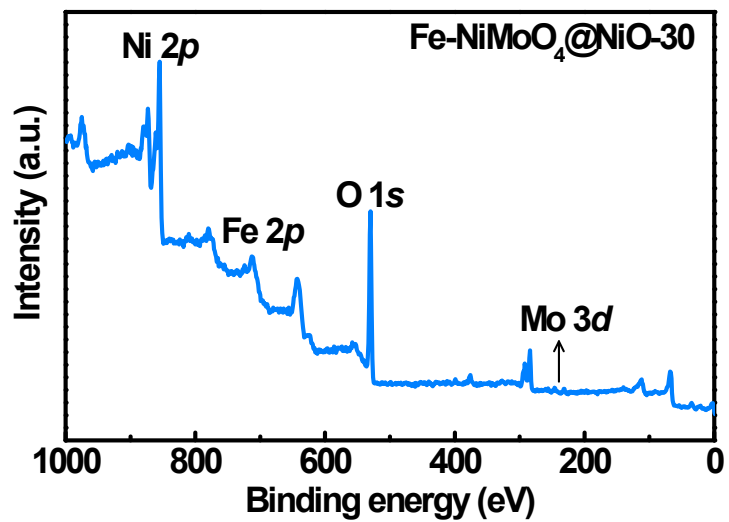

**Fig. S9** XPS survey scan of Fe-NiMoO<sub>4</sub>@NiO-30 sample, where the Mo, Ni, Fe, O elements can be clearly indexed.

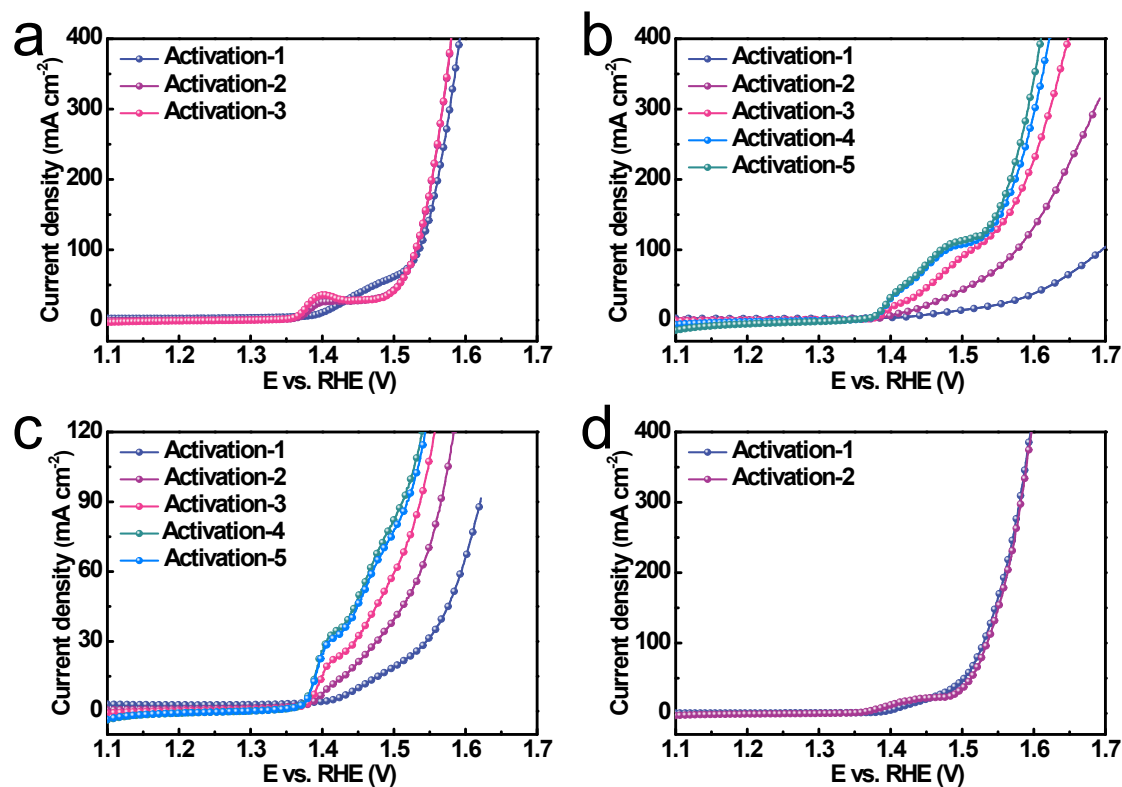

**Fig. S10** Electrochemical activation of (a) NiMoO<sub>4</sub>@NiO, (b) Fe-NiMoO<sub>4</sub>@NiO-5, (c) Fe-NiMoO<sub>4</sub>@NiO-50 and (d) Fe-Fe<sub>2</sub>MoO<sub>4</sub> by LSV scan, where “1, 2 ...” means “first scan, second scan...”

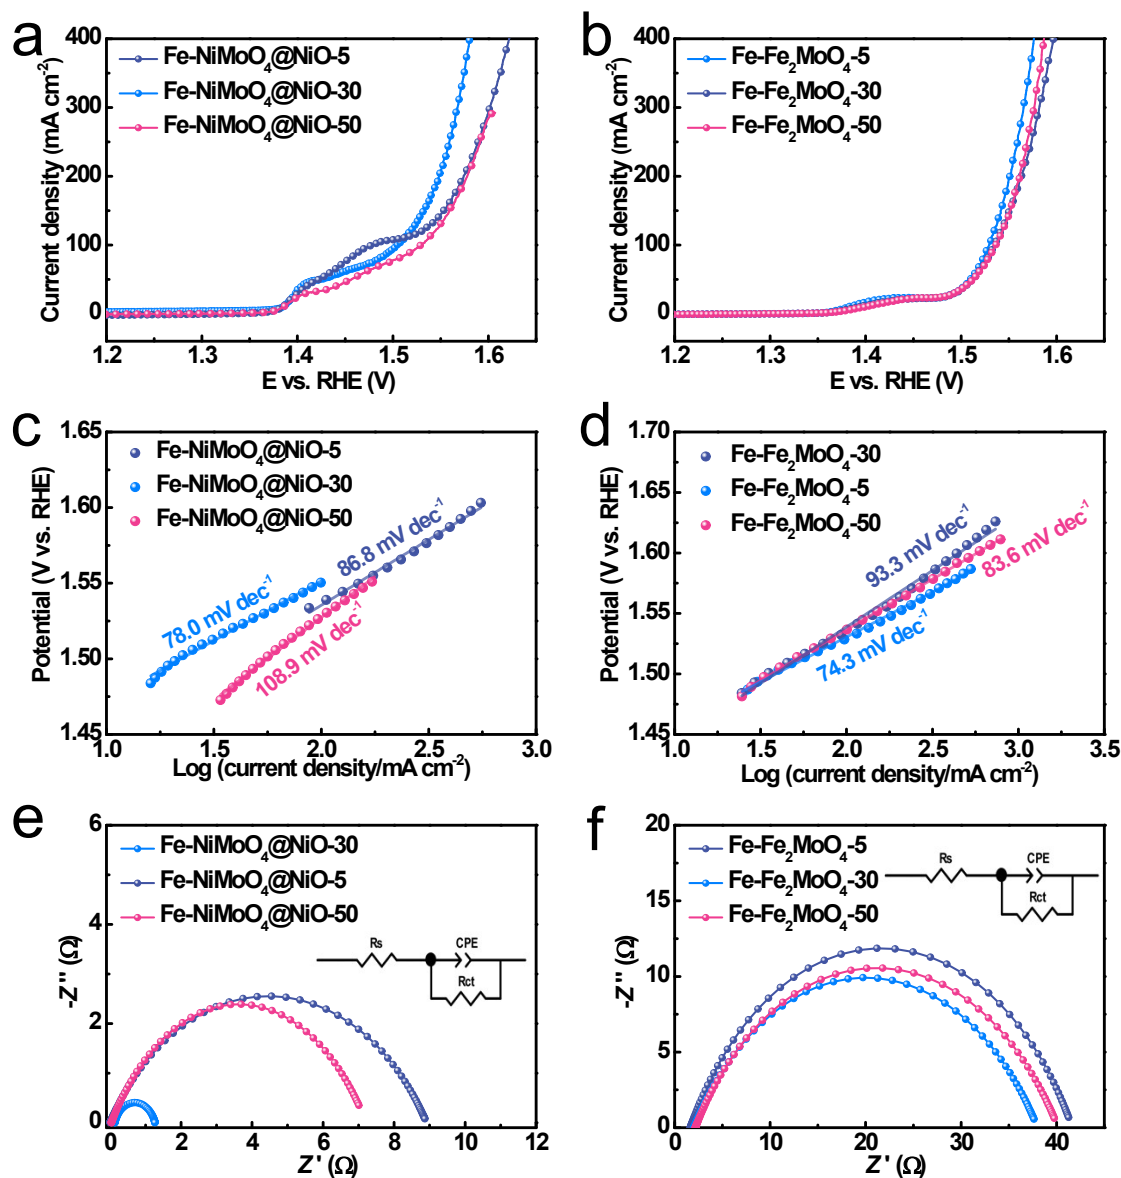

**Fig. S11** Electrochemical activity of  $\text{Fe-NiMoO}_4@\text{NiO-}t$  and  $\text{Fe-Fe}_2\text{MoO}_4-t$ . (a and b) LSV curves, (c and d) Tafel plots, (e and f) EIS plots.



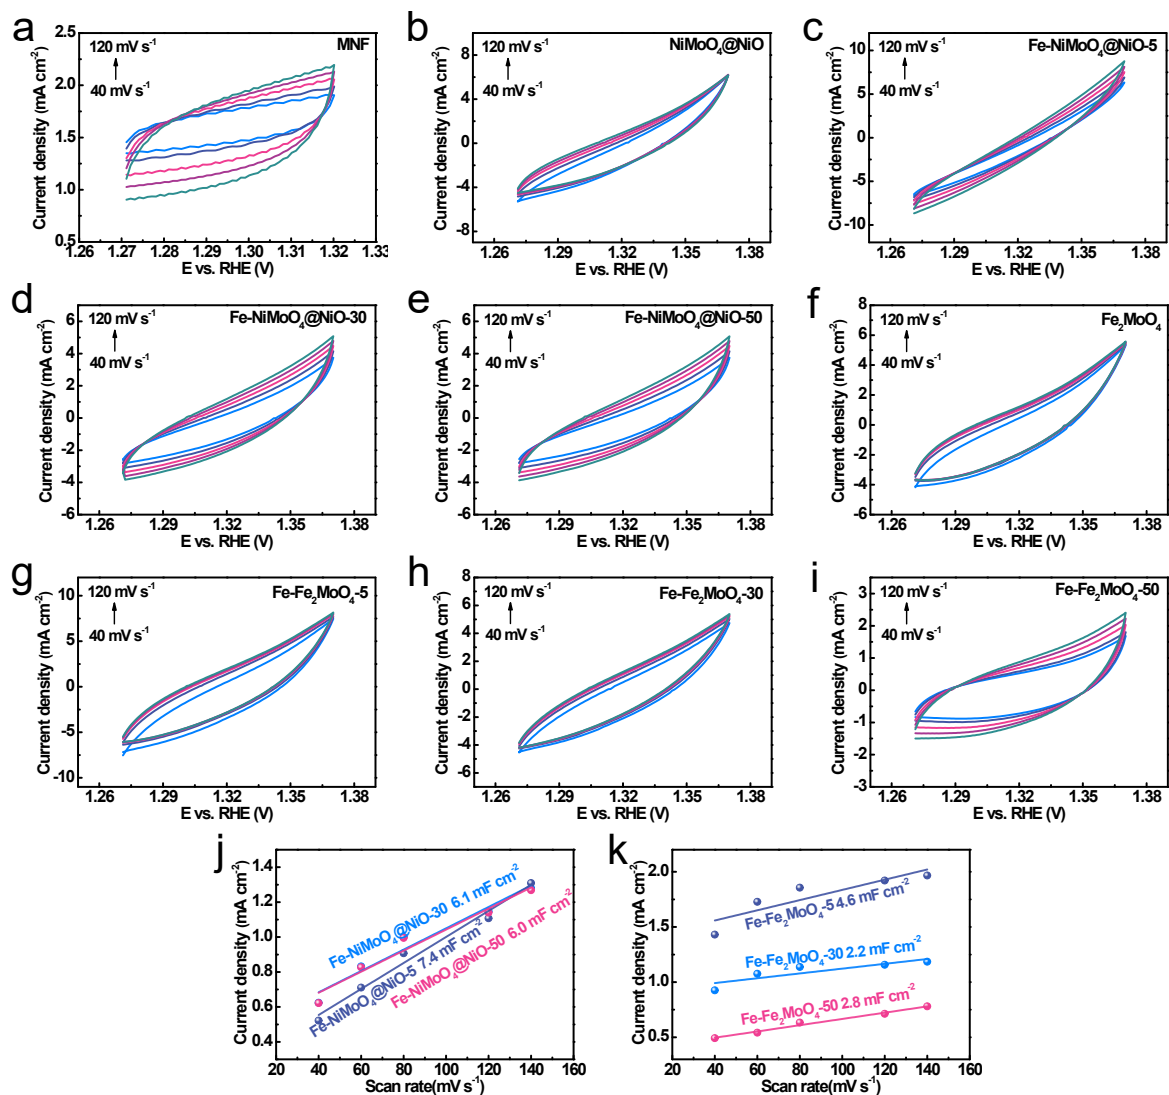

**Fig. S12** (a-i) CV cycles of all the obtained samples with scan rate of 40, 60, 80, 100, 120 mV s<sup>-1</sup> and corresponding  $C_{dl}$  value (j and k).

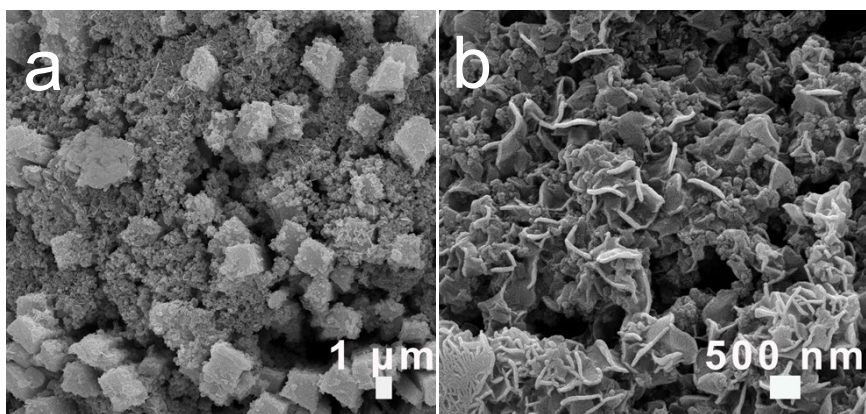

**Fig. S13** SEM morphologies of Fe-NiMoO<sub>4</sub>@NiO-30 after long-term stability of 35 h.

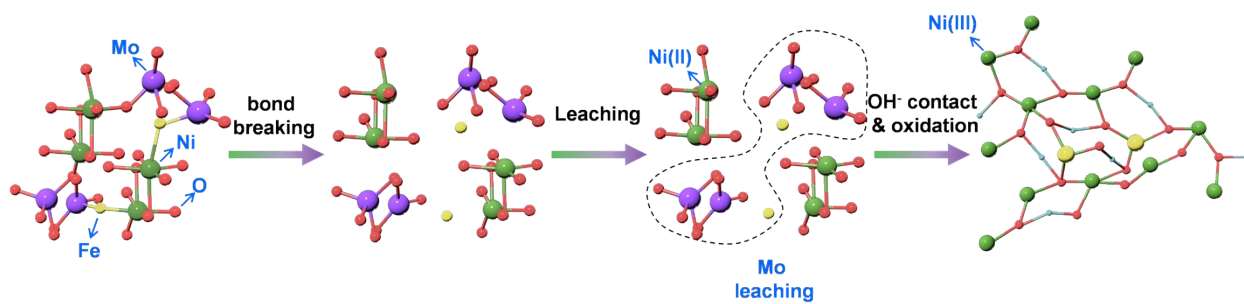

**Fig. S14** Reconstruction process diagram of Fe-NiMoO<sub>4</sub>@NiO-30.

**Table S2** ICP content result of KOH (1 M) electrolyte for Fe-NiMoO<sub>4</sub>@NiO-30 and

Fe-Fe<sub>2</sub>MoO<sub>4</sub>-30 before and after long-term stability.

|                                            | Fe (mg/L) |       | Ni (mg/L) |       | Mo (mg/L) |         |
|--------------------------------------------|-----------|-------|-----------|-------|-----------|---------|
|                                            | Before    | After | Before    | After | Before    | After   |
| <b>Fe-NiMoO<sub>4</sub>@NiO-30</b>         | 0.46      | 0.04  | 0.026     | 0.07  | 0.10      | 1459.61 |
| <b>Fe-Fe<sub>2</sub>MoO<sub>4</sub>-30</b> | 0.46      | 1.20  | 0.026     | 33.77 |           |         |
|                                            |           |       |           |       |           |         |

**Table S3** Comparison of the OER activity of Fe-NiMoO<sub>4</sub>@NiO-30 with the other OER electrocatalysts in 1 M KOH.

| Electrocatalyst                                           | <b>j</b><br>(mA cm <sup>-2</sup> ) | <b>η</b><br>(mV) | <b>b</b><br>(mV dec <sup>-1</sup> ) | Ref.             |
|-----------------------------------------------------------|------------------------------------|------------------|-------------------------------------|------------------|
| <b>Fe-NiMoO<sub>4</sub>@NiO-30</b>                        | 100                                | 274              | 78.0                                | <b>This work</b> |
| <b>Fe-NiMoO<sub>4</sub></b>                               | 100                                | 350              | 90.0                                | [4]              |
| <b>Co<sub>3</sub>S<sub>4</sub>@NiMoO<sub>4</sub></b>      | 100                                | 620              | 102.0                               | [5]              |
| <b>NiCo<sub>2</sub>O<sub>4</sub>@NiMoO<sub>4</sub>/NF</b> | 100                                | 522              | 117.6                               | [6]              |
| <b>NiCo<sub>2</sub>O<sub>4</sub>@NiMoO<sub>4</sub></b>    | 100                                | 413              | 94.1                                | [7]              |
| <b>NiMoO<sub>4</sub></b>                                  | 100                                | 338              | 48.0                                | [8]              |
| <b>NM-FC2</b>                                             | 100                                | 383              | 71.8                                | [9]              |
| <b>CeO<sub>2</sub>-NiMoO<sub>4</sub></b>                  | 100                                | 346              | 79.0                                | [10]             |
| <b><i>α</i>-NiFeMo</b>                                    | 30                                 | 321              | 49.0                                | [11]             |
| <b>SELF-RECONCAT</b>                                      | 100                                | 290              | 66.6                                | [12]             |
| <b>CR-NiOOH</b>                                           | 100                                | 308              | -                                   | [13]             |
| <b>NiFeMo-N<sub>2</sub></b>                               | 100                                | 285              | 26.7                                | [14]             |
| <b>NiCoFeO<sub>x</sub> NHS</b>                            | 100                                | 404              | 58.0                                | [15]             |
| <b>NiFeMo</b>                                             | 100                                | 593              | 35.0                                | [16]             |
| <b>NiFeMo</b>                                             | 100                                | 278              | 59.9                                | [17]             |
| <b>NiFeMo/NF</b>                                          | 100                                | 280              | 42.7                                | [18]             |
| <b>NiFeMoS/NF-P</b>                                       | 100                                | 285              | 69.0                                | [19]             |

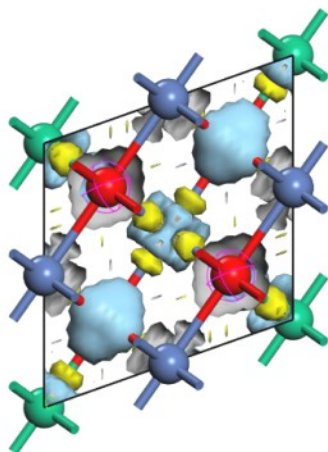

**Fig. S15** The electron density difference of Fe-NiMoO<sub>4</sub>@NiO-30. The blue and yellow represent the increase and decrease of electron density, respectively.

## Reference

- 1 Y. Dong, P.X. Zhang, Z.Y. Yang, Y.P. Li and X.M. Sun, A First-Principles Study of Oxygen Formation Over NiFe-Layered Double Hydroxides Surface, *Catal. Lett.*, 2015, **145**, 1541–1548.
- 2 M. Bajdich, M. García-Mota, A. Vojvodic, J.K. Nørskov and A.T. Bell, Theoretical Investigation of the Activity of Cobalt Oxides for the Electrochemical Oxidation of Water, *J. Am. Chem. Soc.*, 2013, **135**, 13521–13530.
- 3 J. Perdew, J.A. Chevary, S.H. Vosko, K. Jackson, M. Pederson, D.J. Singh and C. Fiolhais, Atoms, molecules, solids, and surfaces: Applications of the generalized gradient approximation for exchange and correlation, *Phys. Rev. B*, 1992, **46**, 6671.
- 4 Z.X. Yin, S. Zhang, W. Chen, M.X. zhi, Y. Zhou, Z.F. Zhang, X. Wang and J.L. Li, Hybrid-atom-doped NiMoO<sub>4</sub> nanotubes for oxygen evolution reaction, *New J. Chem.*, 2020, **44**, 17477–17482.
- 5 L. Chen, G.C. Xu, G. Xu, L. Zhang and H. Ding, Co-based coordination polymer-derived Co<sub>3</sub>S<sub>4</sub> nanotube decorated with NiMoO<sub>4</sub> nanosheets for effective oxygen evolution reaction, *Int. J. Hydrogen Energy*, 2020, **45**, 30463–30472.
- 6 X.Q. Du, J.P. Fu and X.S. Zhang, NiCo<sub>2</sub>O<sub>4</sub>@NiMoO<sub>4</sub> Supported on Nickel Foam for Electrocatalytic Water Splitting, *ChemCatChem*, 2018, **10**, 5533–5540.
- 7 D. Cui, R.D. Zhao, J.Q. Dai, J. Xiang and F.F. Wu, A hybrid NiCo<sub>2</sub>O<sub>4</sub>@NiMoO<sub>4</sub> structure for overall water splitting and excellent hybrid energy storage, *Dalton Trans.*, 2020, **49**, 9668–9679.
- 8 M.B. Rammal and S. Omanovic, Synthesis and characterization of NiO, MoO<sub>3</sub>, and

NiMoO<sub>4</sub> nanostructures through a green, facile method and their potential use as electrocatalysts for water splitting, *Mater. Chem. Phys.*, 2020, **225**, 123570.

9 Z.N. Wang, H. Wang, S. Ji, X.Y. Wang, P.X. Zhou, S.H. Huo, V. Linkov and R.F. Wang, A High Faraday Efficiency NiMoO<sub>4</sub> Nanosheet Array Catalyst by Adjusting the Hydrophilicity for Overall Water Splitting, *Chem. Eur. J.*, 2020, **26**, 12067–12074.

10 W. Gao, C. Wang, F.Y. Ma and D. Wen, Highly active electrocatalysts of CeO<sub>2</sub> modified NiMoO<sub>4</sub> nanosheet arrays towards water and urea oxidation reactions, *Electrochim. Acta*, 2019, **320**, 134608.

11 Y. Duan, Z.-Y. Yu, S.-J. Hu, X.-S. Zheng, C.-T. Zhang, H.-H. Ding, B.-C. Hu, Q.-Q. Fu, Z.-L. Yu, X. Zheng, J.-F. Zhu, M.-R. Gao and S.-H. Yu, Scaled-Up Synthesis of Amorphous NiFeMo Oxides and Their Rapid Surface Reconstruction for Superior Oxygen Evolution Catalysis, *Angew. Chem. Int. Ed.*, 2019, **58**, 15772–15777.

12 Y. Wang, Y.L. Zhu, S.L. Zhao, S.X. She, F.F. Zhang, Y. Chen, T. Williams, T. Gengenbach, L.H. Zu, H.Y. Mao, W. Zhou, Z.P. Shao, H.T. Wang, J. Tang, D.Y. Zhao and C. Selomulya, Anion Etching for Accessing Rapid and Deep Self-Reconstruction of Precatalysts for Water Oxidation, *Matter*, 2020, **3**, 2124–2137.

13 X. Liu, J.S. Meng, K. Ni, R.T. Guo, F.J. Xia, J.J. Xie, X. Li, B. Wen, P.J. Wu, M. Li, J.S. Wu, X.S. Wu, L.Q. Mai and D.Y. Zhao, Complete Reconstruction of Hydrate Pre-Catalysts for Ultrastable Water Electrolysis in Industrial-Concentration Alkali Media, *Cell Rep. Phys. Sci.*, 2020, **1**, 100241.

14 B.C. Moon, W.H. Choi, K.-H. Kim, D.G. Park, J.W. Choi and J.K. Kang, Ultrafine



- Metallic Nickel Domains and Reduced Molybdenum States Improve Oxygen Evolution Reaction of NiFeMo Electrocatalysts, *Small*, 2019, **15**, 1804764.
- 15 M.A.Z.G. Sial, S. Baskaran, A. Jalil, S.H. Talib, H.F. Lin, Y.C. Yao, Q. Zhang, H.X. Qian, J.Z. Zou and X.R. Zeng, NiCoFe oxide amorphous nanohetrostructres for oxygen evolution reaction, *Int. J. Hydrogen Energy*, 2019, **44**, 22991–23001.
- 16 F. Qin, Z.H. Zhao, M. K. Alam, Y. Ni, F. Robles-Hernandez, L. Yu, S. Chen, Z.F. Ren, Z.M. Wang and J.M. Bao, Trimetallic NiFeMo for Overall Electrochemical Water Splitting with a Low Cell Voltage, *ACS Energy Lett.*, 2018, **3**, 546–554.
- 17 Z.H. Lv, Z.H. Li, X. Tan, Z.M. Li, R. Wang, M.J. Wen, X. Liu, G.X. Wang, G.W. Xie and L.H. Jiang, One-step electrodeposited NiFeMo hybrid film for efficient hydrogen production via urea electrolysis and water splitting, *Appl. Surf. Sci.*, 2021, **552**, 149514.
- 18 X.S. Su, Q.Q. Sun, J.J. Bai, Z.L. Wang and C. Zhao, Electrodeposition of porous MoO<sub>4</sub><sup>2-</sup>-doped NiFe nanosheets for highly efficient electrocatalytic oxygen evolution reactions, *Electrochim. Acta*, 2018, **260**, 477–482.
- 19 K.-L. Yan, J.-F. Qin, Z.-Z. Liu, B. Dong, J.-Q. Chi, W.-K. Gao, J.-H. Lin, Y.-M. Chai and C.-G. Liu, Organic-inorganic hybrids-directed ternary NiFeMoS anemone-like nanorods with scaly surface supported on nickel foam for efficient overall water splitting, *Chem. Eng. J.*, 2018, **334**, 922–931.
